# Supplementary material for: Extraction of Pathogenesis-Related Proteins and Phenolics in Sauvignon Blanc as Affected by Grape Harvesting and Processing Conditions
Source: PubMed Central journal article supplement (PMC6152371; doi:10.3390/molecules22071164), 2017-07-12
Supplement: molecules-22-01164-s001.pdf [file molecules-22-01164-s001.pdf]

Supplementary Material

Extraction of pathogenesis-related proteins and phenolics in Sauvignon Blanc as affected by grape harvesting and processing conditions

Bin Tian <sup>1,\*</sup>, Roland Harrison <sup>1</sup>, James Morton <sup>1</sup>, Marlene Jaspers <sup>1</sup>, Simon Hodge <sup>1</sup>, Claire Grose <sup>2</sup> and Mike Trought <sup>2</sup>

Table S1. Compositional analysis of juices and wines from different treatments across the three blocks (*n* = 3).

| Block  | Process | Pressure (Mpa) | Juice Yield (%) | Concentration of Each Component in Juice (mg/L) |              |             |              | Extraction of Each Component in Juice (mg/kg of Grapes) <sup>1</sup> |              |            |            | Concentration of Each Component in Wine (mg/L) |              |             |              |
|--------|---------|----------------|-----------------|-------------------------------------------------|--------------|-------------|--------------|----------------------------------------------------------------------|--------------|------------|------------|------------------------------------------------|--------------|-------------|--------------|
|        |         |                |                 | Proteins *                                      | Phenolics †  | TLPs ‡      | Chitinases † | Proteins                                                             | Phenolics    | TLPs       | Chitinases | Proteins *                                     | Phenolics †  | TLPs ‡      | Chitinases † |
| 2011DP | H-WB    | 0-0.4          | 13.5            | 148.3 ± 38.4                                    | 248.8 ± 34.7 | 113.3 ± 3.4 | 83.2 ± 1.6   | 20.0 ± 5.2                                                           | 33.6 ± 4.7   | 15.3 ± 0.5 | 11.2 ± 0.2 | n/a                                            | n/a          | n/a         | n/a          |
|        |         | 0-0.8          | 42.2            | 159.1 ± 32.7                                    | 195.0 ± 36.1 | 118.3 ± 2.2 | 92.5 ± 0.6   | 67.1 ± 13.8                                                          | 82.3 ± 15.2  | 49.9 ± 0.9 | 39.0 ± 0.2 | n/a                                            | n/a          | n/a         | n/a          |
|        |         | 0-1.6          | 55.7            | 141.0 ± 33.1                                    | 195.5 ± 25.9 | 108.5 ± 1.4 | 89.7 ± 0.8   | 78.6 ± 18.4                                                          | 108.9 ± 14.4 | 60.4 ± 0.8 | 50.0 ± 0.4 | n/a                                            | n/a          | n/a         | n/a          |
|        | H-DC-3  | 0-0.4          | 50.0            | 224.4 ± 37.4                                    | 268.3 ± 35.1 | 119.0 ± 1.3 | 107.0 ± 0.4  | 112.2 ± 18.7                                                         | 134.2 ± 17.5 | 59.5 ± 0.7 | 53.5 ± 0.2 | n/a                                            | n/a          | n/a         | n/a          |
|        |         | 0-0.8          | 60.0            | 192.5 ± 13.9                                    | 242.2 ± 13.6 | 114.6 ± 2.3 | 105.1 ± 2.4  | 115.5 ± 8.4                                                          | 145.3 ± 8.1  | 68.8 ± 1.4 | 63.1 ± 1.5 | n/a                                            | n/a          | n/a         | n/a          |
|        |         | 0-1.6          | 62.7            | 175.3 ± 30.4                                    | 211.2 ± 27.1 | 112.0 ± 0.8 | 102.2 ± 1.6  | 109.9 ± 19.1                                                         | 132.4 ± 17.0 | 70.2 ± 0.5 | 64.1 ± 1.0 | n/a                                            | n/a          | n/a         | n/a          |
|        | M-DC-3  | 0-0.4          | 50.4            | 153.8 ± 38.6                                    | 217.8 ± 39.3 | 98.1 ± 5.3  | 83.1 ± 4.9   | 77.5 ± 19.5                                                          | 109.8 ± 19.8 | 49.4 ± 2.7 | 41.9 ± 2.5 | n/a                                            | n/a          | n/a         | n/a          |
|        |         | 0-0.8          | 63.9            | 121.9 ± 7.2                                     | 196.3 ± 11.2 | 102.2 ± 2.2 | 87.6 ± 1.7   | 77.9 ± 4.6                                                           | 125.4 ± 7.1  | 65.3 ± 1.4 | 56.0 ± 1.1 | n/a                                            | n/a          | n/a         | n/a          |
|        |         | 0-1.6          | 71.5            | 118.8 ± 15.7                                    | 180.1 ± 15.2 | 98.5 ± 0.8  | 85.4 ± 0.8   | 85.0 ± 11.3                                                          | 128.8 ± 10.9 | 70.4 ± 0.6 | 61.1 ± 0.6 | n/a                                            | n/a          | n/a         | n/a          |
| 2012DP | H-WB    | 0-0.4          | 15.7            | 170.7 ± 18.7                                    | 228.0 ± 1.7  | 138.8 ± 4.6 | 94.1 ± 4.1   | 26.8 ± 2.9                                                           | 35.8 ± 0.3   | 21.8 ± 0.7 | 14.8 ± 0.6 | 87.5 ± 5.9                                     | 203.0 ± 5.9  | 92.2 ± 3.8  | 43.5 ± 1.4   |
|        |         | 0.4-0.8        | 26.6            | 205.5 ± 6.4                                     | 224.6 ± 3.8  | 160.2 ± 3.1 | 116.2 ± 0.4  | 54.7 ± 1.7                                                           | 59.8 ± 1.0   | 42.6 ± 0.8 | 30.9 ± 0.1 | 120.2 ± 20.1                                   | 202.7 ± 1.7  | 104.8 ± 3.2 | 62.7 ± 3.4   |
|        |         | 0-0.8          | 42.3            | 181.0 ± 11.2                                    | 222.4 ± 0.8  | 152.0 ± 2.0 | 110.0 ± 0.5  | 76.6 ± 4.7                                                           | 94.1 ± 0.4   | 64.3 ± 0.9 | 46.5 ± 0.2 | 107.3 ± 7.4                                    | 201.9 ± 4.3  | 99.4 ± 5.2  | 59.2 ± 3.4   |
|        |         | 0.8-1.6        | 19.6            | 144.3 ± 6.6                                     | 250.8 ± 8.7  | 123.6 ± 1.1 | 97.9 ± 0.8   | 28.3 ± 1.3                                                           | 49.1 ± 1.7   | 24.2 ± 0.2 | 19.2 ± 0.2 | 90.4 ± 11.1                                    | 213.8 ± 3.4  | 72.8 ± 3.7  | 45.3 ± 3.4   |
|        |         | 0-1.6          | 61.9            | 181.1 ± 5.6                                     | 232.1 ± 3.5  | 140.8 ± 3.2 | 105.6 ± 1.5  | 112.1 ± 3.5                                                          | 143.7 ± 2.1  | 87.1 ± 2.0 | 65.4 ± 0.9 | 116.6 ± 12.3                                   | 209.1 ± 0.8  | 92.9 ± 3.9  | 54.7 ± 2.1   |
|        | H-DC-3  | 0-0.4          | 49.0            | 182.5 ± 13.8                                    | 275.8 ± 1.7  | 136.9 ± 4.0 | 100.2 ± 2.4  | 89.4 ± 6.8                                                           | 135.1 ± 0.8  | 67.1 ± 1.9 | 49.1 ± 1.2 | 103.7 ± 2.8                                    | 236.9 ± 3.2  | 81.4 ± 4.4  | 44.5 ± 3.2   |
|        |         | 0.4-0.8        | 12.3            | 201.2 ± 20.4                                    | 259.1 ± 0.8  | 148.6 ± 3.3 | 115.6 ± 1.7  | 24.7 ± 2.5                                                           | 31.9 ± 0.1   | 18.3 ± 0.4 | 14.2 ± 0.2 | 114.1 ± 10.2                                   | 219.4 ± 1.3  | 97.9 ± 8.2  | 58.2 ± 3.9   |
|        |         | 0-0.8          | 61.3            | 162.4 ± 19.9                                    | 272.7 ± 1.0  | 138.0 ± 3.5 | 102.4 ± 2.7  | 99.6 ± 12.2                                                          | 167.2 ± 0.6  | 84.6 ± 2.1 | 62.8 ± 1.6 | 90.9 ± 11.5                                    | 230.2 ± 3.9  | 83.3 ± 5.6  | 46.3 ± 4.9   |
|        |         | 0.8-1.6        | 8.6             | 157.3 ± 12.1                                    | 300.2 ± 2.4  | 116.3 ± 4.3 | 94.9 ± 0.7   | 13.5 ± 1.0                                                           | 25.8 ± 0.2   | 10.0 ± 0.4 | 8.2 ± 0.1  | 66.9 ± 8.7                                     | 240.2 ± 2.9  | 63.2 ± 10.8 | 30.0 ± 7.4   |
|        |         | 0-1.6          | 69.9            | 182.4 ± 11.7                                    | 274.6 ± 0.5  | 134.7 ± 4.1 | 100.8 ± 2.5  | 127.5 ± 8.2                                                          | 192.0 ± 0.3  | 94.2 ± 2.9 | 70.5 ± 1.7 | 95.9 ± 11.2                                    | 211.9 ± 7.9  | 83.0 ± 5.6  | 48.0 ± 3.7   |
|        | M-DC-3  | 0-0.4          | 55.3            | 158.1 ± 9.0                                     | 267.7 ± 1.3  | 137.0 ± 4.3 | 103.4 ± 1.6  | 87.5 ± 5.0                                                           | 148.0 ± 0.7  | 75.8 ± 2.4 | 57.2 ± 0.9 | 102.4 ± 6.0                                    | 223.0 ± 11.4 | 88.7 ± 2.0  | 45.6 ± 5.3   |
|        |         | 0.4-0.8        | 12.9            | 112.7 ± 42.0                                    | 263.3 ± 7.3  | 124.0 ± 2.9 | 104.3 ± 0.7  | 14.5 ± 5.4                                                           | 34.0 ± 0.9   | 16.0 ± 0.4 | 13.4 ± 0.1 | 75.6 ± 10.4                                    | 221.9 ± 0.5  | 70.5 ± 2.4  | 34.5 ± 1.8   |
|        |         | 0-0.8          | 68.2            | 158.3 ± 12.7                                    | 269.1 ± 2.2  | 133.3 ± 5.1 | 102.9 ± 0.8  | 108.0 ± 8.7                                                          | 183.5 ± 1.5  | 90.9 ± 3.5 | 70.2 ± 0.6 | 95.8 ± 10.6                                    | 229.6 ± 2.9  | 85.8 ± 5.0  | 43.6 ± 3.6   |
|        |         | 0.8-1.6        | 4.8             | 32.8 ± 4.1                                      | 299.9 ± 7.1  | 108.2 ± 2.1 | 98.3 ± 0.7   | 1.6 ± 0.2                                                            | 14.4 ± 0.3   | 5.2 ± 0.1  | 4.7 ± 0.0  | 60.2 ± 15.2                                    | 269.4 ± 4.6  | 53.0 ± 8.5  | 24.1 ± 5.5   |
|        |         | 0-1.6          | 73.0            | 164.8 ± 10.4                                    | 272.1 ± 1.7  | 132.4 ± 4.3 | 102.3 ± 0.6  | 120.3 ± 7.6                                                          | 198.7 ± 1.3  | 96.6 ± 3.1 | 74.7 ± 0.5 | 84.7 ± 9.7                                     | 220.8 ± 6.6  | 75.6 ± 5.4  | 37.5 ± 1.1   |
| 2012BM | H-WB    | 0-0.4          | 16.7            | 51.5 ± 8.8                                      | 175.2 ± 9.0  | 55.3 ± 1.4  | 28.7 ± 2.4   | 8.6 ± 1.5                                                            | 29.3 ± 1.5   | 9.2 ± 0.2  | 4.8 ± 0.4  | n/a                                            | n/a          | n/a         | n/a          |
|        |         | 0-0.8          | 43.3            | 78.7 ± 3.6                                      | 179.5 ± 8.1  | 73.1 ± 1.2  | 42.0 ± 0.1   | 34.1 ± 1.6                                                           | 77.7 ± 3.5   | 31.6 ± 0.5 | 18.2 ± 0.1 | n/a                                            | n/a          | n/a         | n/a          |
|        |         | 0-1.6          | 62.0            | 71.8 ± 2.7                                      | 161.6 ± 25.1 | 59.4 ± 7.1  | 36.8 ± 3.7   | 44.5 ± 1.7                                                           | 100.2 ± 15.5 | 36.8 ± 4.4 | 22.8 ± 2.3 | n/a                                            | n/a          | n/a         | n/a          |
|        | H-DC-3  | 0-0.4          | 48.0            | 79.8 ± 11.9                                     | 229.8 ± 20.1 | 72.6 ± 6.8  | 44.0 ± 3.4   | 38.3 ± 5.7                                                           | 110.3 ± 9.7  | 34.8 ± 3.2 | 21.1 ± 1.6 | n/a                                            | n/a          | n/a         | n/a          |
|        |         | 0-0.8          | 61.0            | 91.5 ± 42.0                                     | 241.6 ± 8.2  | 76.1 ± 5.2  | 48.0 ± 3.0   | 55.8 ± 25.6                                                          | 147.4 ± 5.0  | 46.4 ± 3.2 | 29.3 ± 1.9 | n/a                                            | n/a          | n/a         | n/a          |
|        |         | 0-1.6          | 68.7            | 71.0 ± 16.0                                     | 200.7 ± 11.4 | 61.5 ± 5.9  | 39.1 ± 4.2   | 48.8 ± 11.0                                                          | 137.9 ± 7.8  | 42.2 ± 4.0 | 26.9 ± 2.9 | n/a                                            | n/a          | n/a         | n/a          |
|        | M-DC-3  | 0-0.4          | 56.3            | 84.5 ± 10.9                                     | 244.6 ± 13.2 | 67.5 ± 3.9  | 44.9 ± 2.1   | 47.6 ± 6.1                                                           | 137.7 ± 7.4  | 38.0 ± 2.2 | 25.3 ± 1.2 | n/a                                            | n/a          | n/a         | n/a          |
|        |         | 0-0.8          | 70.7            | 56.4 ± 11.6                                     | 229.8 ± 8.1  | 60.8 ± 2.2  | 39.8 ± 0.7   | 39.9 ± 8.2                                                           | 162.4 ± 5.8  | 43.0 ± 1.5 | 28.2 ± 0.5 | n/a                                            | n/a          | n/a         | n/a          |
|        |         | 0-1.6          | 71.2            | 63.7 ± 7.9                                      | 242.2 ± 7.4  | 60.9 ± 1.1  | 40.6 ± 0.8   | 45.3 ± 5.6                                                           | 172.4 ± 5.3  | 43.4 ± 0.8 | 28.9 ± 0.6 | n/a                                            | n/a          | n/a         | n/a          |

<sup>1</sup> extracted amount of each component is calculated by multiplying juice yield and corresponding concentration. \* protein concentration was determined by EZQ kit, which is expressed as ovalbumin equivalent; † phenolics was determined by Folin-Ciocalteu method, which is expressed as gallic acid equivalent; ‡ TLPs and chitinases were determined by RP-HPLC, which is expressed as thaumatin equivalent. n/a, juices were not bottle fermented to get wines.
